# Supplementary material for: WDR5 inhibition halts metastasis dissemination by repressing the mesenchymal phenotype of breast cancer cells
Source: Springer Nature journal article supplement (doi:10.1186/s13058-019-1216-y), 2019-11-21
Supplement: MOESM2 [file 17416002]

1 **Supplementary Table S1.**

2

| Patients     | Site of metastasis | Diagnosis | Characterization |     |      |      | Subtype | Treatment at relapse |
|--------------|--------------------|-----------|------------------|-----|------|------|---------|----------------------|
|              |                    |           | ER               | PgR | HER2 | Ki67 |         |                      |
| <b>MBC2</b>  | lung               | 2013      | 0%               | 0%  | -    | 50%  | TN      | ViFuP                |
| <b>MBC3</b>  | lung               | 2013      | >95%             | 0%  | -    | 32%  | LB      | FULVESTRANT          |
| <b>MBC7</b>  | liver              | 2012      | 1%               | <1% | -    | 83%  | TN      | BEXE                 |
| <b>MBC10</b> | lung               | 2014      | 90%              | 0%  | -    | 40%  | LB      | LETROZOLE            |
| <b>MBC18</b> | liver              | 2012      | 95%              | 0%  | -    | 80%  | LB      | LETROZOLE            |
| <b>MBC22</b> | liver              | 2012      | 95%              | 95% | -    | 25%  | LB      | CAPECITABINE         |
| <b>MBC26</b> | liver              | 2012      | 75%              | 1%  | -    | 59%  | LB      | TAXOL                |

3

4

5

6

7

8

9

10

11

12

13

14

15

16

17

18 **Supplementary Table S2.**

19

|              |             | <b>ER</b> | <b>PgR</b> | <b>HER2</b> | <b>Ki67</b> | <b>SUBTYPE</b> |
|--------------|-------------|-----------|------------|-------------|-------------|----------------|
| <b>MBC2</b>  | <b>PT</b>   | 0%        | 0%         | 0%          | 50%         | TN             |
|              | <b>PDX4</b> | 0%        | 0%         | 0%          | 85%         | TN             |
| <b>MBC3</b>  | <b>PT</b>   | >95%      | 0%         | 1 (50%)     | 32%         | LB             |
|              | <b>PDX3</b> | >95%      | 5%         | 2 (40%)     | 45%         | LB             |
| <b>MBC7</b>  | <b>PT</b>   | 1%        | <1%        | 0%          | 83%         | TN             |
|              | <b>PDX4</b> | 1%        | 1%         | 0%          | 75%         | TN             |
| <b>MBC10</b> | <b>PT</b>   | 90%       | 0%         | 1(20%)      | 40%         | LB             |
|              | <b>PDX2</b> | >95%      | 0%         | 1(10%)      | 65%         | LB             |
| <b>MBC18</b> | <b>PT</b>   | 95%       | 0%         | 1 (10%)     | 80%         | LB             |
|              | <b>PDX2</b> | 95%       | 10%        | 1(10%)      | 85%         | LB             |
| <b>MBC22</b> | <b>PT</b>   | 95%       | 95%        | 0%          | 25%         | LB             |
|              | <b>PDX3</b> | 95%       | 90%        | 0%          | 38%         | LB             |
| <b>MBC26</b> | <b>PT</b>   | 75%       | 1%         | 1 (40%)     | 59%         | LB             |
|              | <b>PDX3</b> | >95%      | 0%         | 2(50%)      | 70%         | LB             |

20

21

22

23

24

25

26

27 **Supplementary Table S3. (See Excel file Table S3)**

28

29 **Supplementary Table S4.**

30

|               |                           |
|---------------|---------------------------|
| <b>ECE1</b>   |                           |
| FORWARD       | CTCACCCAAGGCCTTAAACT      |
| REVERSE       | GTTCCCGTCCTTGTCACTC       |
| <b>HSPA1B</b> |                           |
| FORWARD       | CTACCATTGAGGAGGTGGATTAG   |
| REVERSE       | CAAAGAAGTGAAGCAGCAAAGA    |
| <b>PNP</b>    |                           |
| FORWARD       | GCAATAATCTGTGGTTCTGGATTAG |
| REVERSE       | CATGACCTGGCACTGTACTT      |
| <b>CEMIP</b>  |                           |
| FORWARD       | TCCTGCACCTTGGATTTAGAC     |
| REVERSE       | GAGCCTCGATGTCCATGATATT    |
| <b>AIF1L</b>  |                           |
| FORWARD       | AAGGCGAGATTGACCTGATG      |
| REVERSE       | TCCTGTACCTCTGAGATCAT      |
| <b>GBP1</b>   |                           |
| FORWARD       | GGCTATGGACCAACTGTAATATG   |
| REVERSE       | AGCTGAATCCTCAACCTCATTC    |
| <b>HMOX1</b>  |                           |
| FORWARD       | TGCTCAACATCCAGCTCTTT      |
| REVERSE       | TGCCACATTAGGGTGTCTTC      |
| <b>IL32</b>   |                           |

|                 |                         |
|-----------------|-------------------------|
| FORWARD         | GTCTCTCTCGGCTGAGTATTTG  |
| REVERSE         | CTCTTTGAAGTCGTCCTCCAG   |
| <hr/>           |                         |
| <b>TMEM184B</b> |                         |
| FORWARD         | CCCATTGAGTCCAGCTGTATG   |
| REVERSE         | GCTGACGGAGATGTTGTAGATG  |
| <hr/>           |                         |
| <b>TNFAIP3</b>  |                         |
| FORWARD         | TCATCCACAAAGCCCTCATC    |
| REVERSE         | CATCATTCCAGTTCCGAGTATCA |
| <hr/>           |                         |
| <b>CALB2</b>    |                         |
| FORWARD         | CGCAGACGGAAATGGGTATATT  |
| REVERSE         | ACATCATGCCAGAGCCTTTC    |
| <hr/>           |                         |
| <b>GCNT2</b>    |                         |
| FORWARD         | ACTCAATAGGATTCCAGGTGTTC |
| REVERSE         | GTCTTCCATGTCACTCCACTTTA |
| <hr/>           |                         |
| <b>GMPR</b>     |                         |
| FORWARD         | TGTCACAGCACTCCATGTTTA   |
| REVERSE         | TGAACTCACGGCTACATTCTG   |
| <hr/>           |                         |
| <b>DKC1</b>     |                         |
| FORWARD         | AACCACAAGGATGAGAGTTACC  |
| REVERSE         | GGCATTACTGCACTGTCTTTC   |
| <hr/>           |                         |
| <b>WDR5</b>     |                         |
| FORWARD         | CACAAGCTGGGAATATCCGATG  |
| REVERSE         | GGGGATTGAAGTTGCAGCAAAA  |
| <hr/>           |                         |
| <b>VIM</b>      |                         |
| FORWARD         | AAAGTGTGGCTGCCAAGAAC    |

|                               |                          |
|-------------------------------|--------------------------|
| REVERSE                       | AGCCTCAGAGAGGTCAGCAA     |
| <b>CDH2</b>                   |                          |
| FORWARD                       | GGGATCAAAGCCTGGAACATA    |
| REVERSE                       | GACACGATTCTGTACCTCAACA   |
| <b>SNAI2</b>                  |                          |
| FORWARD                       | CTTCCTGGTCAAGAAGCATTTTC  |
| REVERSE                       | GGGAAATAATCACTGTATGTGTGT |
| <b>SNAI1</b>                  |                          |
| FORWARD                       | ACTATGCCGCGCTCTTTC       |
| REVERSE                       | GCTGGAAGGTAAACTCTGGATTA  |
| <b>TWIST1</b>                 |                          |
| FORWARD                       | ACTGGACACACATACAGTGATTAT |
| REVERSE                       | GAATGGAGCAGCGGTAGTC      |
| <b>TGF<math>\beta</math>1</b> |                          |
| FORWARD                       | CGTGGAGCTGTACCAGAAATAC   |
| REVERSE                       | CACAACTCCGGTGACATCAA     |
